# Supplementary material
Source: PubMed Central journal article supplement (PMC2567189)
Supplement: 0806221105_0806221105SI.pdf [file 0806221105_0806221105SI.pdf]

# Supporting Information

## Webster and Sil 10.1073/pnas.0806221105

### SI Materials and Methods

***H. capsulatum* Insertional Mutagenesis.** *H. capsulatum* strain G217B was transformed with the *Agrobacterium tumefaciens* strain LBA1100 [the kind gift of Bruce Klein (University of Wisconsin, Madison) with permission from Paul Hooykas (Leiden University, Leiden, The Netherlands)] carrying the plasmid pRH5b (1) or pBTS4 (2). The coculturing of *H. capsulatum* with *A. tumefaciens* was done as previously described (2), and transformants were selected on HMM agarose plates supplemented with 200  $\mu$ g/ml hygromycin B and 200  $\mu$ g/ml cefotaxime. Approximately 40,000 insertion mutants were screened visually at 37°C to identify a total of 15 filamentous strains. The locations of the insertions were mapped by digesting mutant genomic DNA with *HindIII* and performing inverse PCR (3). The primers OAS907 (5'-gtaagcggcactccacatc-3') and OAS908 (5'-gttgccagcctgaatggcg-3') were used to amplify the left border of mutants generated with either plasmid. To map the right border of mutants generated with pBTS4, the primers OAS750 (5'-ggctcctcaacgttgcgg-3') and OAS910 (5'-gcttccggctcgtatgttg-3') were used. To map the right border of mutants generated with pRH5b, the primers OAS1322 (5'-ggcgacacggaaatgttgaatactc-3') and OAS750 were used. Two mutants had insertions in the ORF of *RYP2* (M9 and M15), and one mutant had a 20-kb deletion at the site of insertion that contained the *RYP3* gene as well as two other predicted genes (F14) (Fig. S1).

**Genomic DNA Preparation and Southern Analysis.** Genomic DNA from *H. capsulatum* wild-type and mutant cells was isolated and subjected to Southern analysis as previously described (1).

**RNA Interference Against *RYP2* and *RYP3*. Integrated RNAi constructs.** *H. capsulatum* strain G217B was cocultured with *A. tumefaciens* strain LBA1100 containing either the vector control pVN69 (1), pRH15, or pRH17 (Fig. S2A). All plasmids are derived from pFANTAi4 (4). pRH15 contains a 487-bp hairpin repeat of the large exon in the *RYP2* coding sequence (Fig. S2B) generated by PCR amplification of *H. capsulatum* G217B genomic DNA with OAS1482 (5'-ggggacaagttgtacaacaaagcaggctcacatgaatcgagcggaca-3') and OAS1483 (5'-ggggaccactttgtacaagaagctggtagattcccatctgtgacat-3'). pRH17 contains a 498-bp hairpin repeat targeting one of the long exons in the *RYP3* coding sequence (Fig. S2B) which was PCR-amplified using OAS1484 (5'-ggggacaagttgtacaacaaagcaggctcacacacctctactcagtc-3') and OAS1485 (5'-ggggaccactttgtacaagaagctggtagattcccatctcagtcgcaac-3'). Integrated RNAi strains were used to perform the experiments described in Figs. 3, 5, and 6.

**Episomal RNAi constructs.** *H. capsulatum* strain G217B $\Delta$  was transformed by electroporation as described previously (5), with the vector control pCR186 [a kind gift of Chad Rappleye (Ohio State University) derived from pCR138 (6)], pRH27, or pRH29 (Fig. S2A). pRH27 contains the same 487 bp of the *RYP2* coding sequence as pRH15. The hairpin repeat segments were generated by PCR amplification of *H. capsulatum* G217B genomic DNA with tailed primers OAS1507 (5'-ggcgcccattgaatcgagcggaca-3') and OAS1508 (5'-ctcgaggattgccatctgtgacat-3') and tailed primers OAS1509 (5'-actagtcattgaatcgagcggaca-3') and OAS1510 (5'-accggtgattgccatctgtgacat-3') followed by the insertion of each piece into the *AscI*-*XhoI* sites and the *SpeI*-*AgeI* sites of the pCR186 backbone, respectively. pRH29 was constructed in a similar manner, with the 498bp of *RYP3*, as in pRH17, as the hairpin repeat segments. The fragments were PCR amplified by the *AscI* and *XhoI* tailed primers OAS1499

(5'-ggcgcccagcaccattctactgctc-3') and OAS1500 (5'-ctc-gagaacgagccttcagtcgcaac-3') and *SpeI* and *AgeI* tailed primers OAS1501 (5'-actagtcgacaccttactgctc-3') and OAS1502 (5'-accggtgagcagccttcagtcgcaac-3'). Transformants were selected on HMM agarose plates grown at 37°C for 2 weeks. Episomal RNAi strains were used to perform the experiments shown in Fig. 1. To screen for cells that lost the episomal RNAi plasmids, these strains were grown on HMM agarose plates supplemented with 100  $\mu$ g/ml uracil and incubated at 37°C with 5% CO<sub>2</sub> for 2 weeks. Colonies were patched onto HMM agarose plates in the absence of uracil supplementation to identify cells that no longer contained the *URA5* marker present on the episomal plasmid. Genomic DNA was obtained and screened by PCR using primers that recognize the episomal plasmid to confirm that plasmid sequences were not present [PCR was performed with OAS249 (5'-ggcgattaagtgg-3') and OAS1488 (5'-cacatgaagcagcagcactt-3')].

**Microscopy.** All images were obtained by using a Zeiss Axiovert 200 microscope with either a DIC or Phase objective.

**RNA Preparation and Northern Analysis.** Total RNA from *H. capsulatum* wild-type and mutant cells was isolated and subjected to Northern analysis as previously described (1). Probes were amplified from G217B genomic DNA with the following primers: *RYP2* – OAS1964 (5'-ccctccacctattatccaac-3') and OAS1976 (5'-agaactgtacgggcttctc-3'); *RYP3* – OAS1977 (5'-gaactgtccaactgtgca-3') and OAS1978 (5'-gaaaaaggtgaaggaatgac-3'); and *GAPDH* – OAS1120 (5'-accaacaggcctacatgctc-3') and OAS1121 (5'-tactgctcgtgtgattgc-3').

**Mapping of *RYP2*, *RYP3*, and *VEA1* Transcripts.** Total RNA was isolated from *H. capsulatum* G217B and treated with DNaseI (Promega). To identify the 5' and 3' ends of the *VEA1*, *RYP2*, and *RYP3* transcripts, the FirstChoice RLM-RACE Kit (Ambion) was used per the manufacturer's instructions. For 5' RACE, the following primers were used: *RYP2* – OAS1970 (5'-acctgaaagccatgtggac-3') and OAS1971 (5'-aacgactctctctc-gagc-3'); *RYP3* – OAS1972 (5'-tatgctgttggcggtatcc-3') and OAS1973 (5'-gacgtagaagtaggtgtcga-3'); and *VEA1* – OAS1974 (5'-cttggctctctcattct-3') and OAS1975 (5'-cctgtcaggacagc-catga-3'). For 3' RACE, the following primers were used: *RYP2* – OAS1958 (5'-aaggctatcctactgctgga-3') and OAS1959 (5'-atgtcacagatggcggaatc-3'); *RYP3* – OAS1960 (5'-tcaatgtgtgctc-gcact-3') and OAS1961 (5'-gacagtcacatggctccaaa-3'); and *VEA1* – OAS1962 (5'-tacgaccaatcgaagtctc-3') and OAS1963 (5'-cacctccagcagcaatagca-3'). The transcript coding sequences were amplified from reverse transcribed cDNA using the following primer pairs: *RYP2* – OAS1964 (5'-ccctccacctattatccaac-3') and OAS1965 (5'-gattgccatctgtgacat-3'); *RYP3* – OAS1966 (5'-ccatggatcactccagcat-3') and OAS1967 (5'-tttgagccatgt-gactgtc-3'); and *VEA1* – OAS1968 (5'-gagactgacatcattatgctc-3') and OAS1969 (5'-tgctattgctgctggaggtg-3'). All amplified products were cloned by using the TOPO-TA system (Stratagene) and sequenced with M13-forward and M13-reverse primers.

**Quantitative RTPCR (qRTPCR).** Total RNA from *H. capsulatum* G217B and control, *RYP2*, and *RYP3* RNAi strains was isolated and subjected to qRTPCR as previously described (5). The transcripts were amplified with the following primers: *RYP2* – OAS1942 (5'-cggtcagagatgaagtcgtt-3') and OAS1943 (5'-aagtgtacggcttctctccg-3'); *RYP3* – OAS1944 (5'-ccaaggccaagat-

ggagaagg-3') and OAS1945 (5'-ggaatgagaggaaggggaaaga-3'); *RYP1* – OAS1057 (5'-acccttcagcttacaacct-3') and OAS1058 (5'-tccgtccatcgcttaataacc-3'); and *TEF1* – OAS1687 (5'-tcgatccattgacccattgaac-3') and OAS1689 (5'-gagaactgcaagcaagtgggca-3'). All intensity signals from the *RYP* genes were normalized to the *TEF1* expression levels.

**Chromatin Immunoprecipitation.** Chromatin immunoprecipitation was performed as previously described (1). PCR primers were designed at  $\approx$ 500-bp intervals across the 6-kb intergenic region immediately upstream of the *RYP2* ORF (Table S2). PCR primers were designed at  $\approx$ 150-bp intervals across the 1.2-kb intergenic region immediately upstream of the *RYP3* ORF (Table S2). *TEF1* was used as the reference ORF (Table S2).

**Spore Viability. Spore harvest.** Spores were obtained from the control, *RYP2*, and *RYP3* RNAi strains by first growing a dense culture in HMM liquid for 2 weeks at either room temperature (for the control) or 37°C (for the RNAi mutants). To initiate spore formation using standard conditions, 1 ml of culture was inoculated onto 15 cm Sabouraud agar plates. The plates were allowed to grow in a closed container with minimal exposure to light at room temperature for 4 weeks. Plates were flooded with PBS, and spores were harvested by gentle agitation with a glass rod. The spore suspensions were filtered through glass wool to minimize contaminating filaments and collected by centrifugation at  $2,000 \times g$  for 10 min at 4°C. Spores were stored at 4°C. **Viability testing.** Spores from the control, *RYP2*, and *RYP3* RNAi strains were stained with lactophenol blue and quantified immediately after harvesting. BHI agar plates supplemented with 10% sheep's blood were inoculated with spores at regular intervals over the course of 7 days, and incubated at 30°C. The percent viability was calculated as a ratio of the number of CFUs growing on the BHI plates to the number of spores inoculated initially. The percent viability of the each strain was normalized to the viability of the control strain on Day 0.

**Host–Cell Interactions. Macrophage infections.** Murine bone marrow-derived macrophages (BMDMs) were isolated and differentiated as described previously (5). The macrophages were seeded into wells of 24-well tissue culture plates containing coverslips for use in staining. The BMDMs were infected with spores from

the control, *RYP2*, or *RYP3* RNAi strains at an MOI of 0.1. The infected macrophage plates were spun for 5 min at  $500 \times g$  at room temperature. After 2 h incubation, the macrophages were washed twice with BMM (5) and then incubated in fresh BMM. At 48 and 72 h postinfection, the BMM was aspirated and the macrophages were fixed in 3.7% formaldehyde for 1 min. The macrophages were washed twice with water and stored in PBS at 4°C.

**Infection Staining.** The *H. capsulatum* cells and macrophage monolayer were stained with Periodic Acid-Schiff base (PAS) (Sigma). The cells were incubated with periodic acid for 5 min and then washed 5 times with water. Schiff base was added to the cells and incubated for 5–10 min. Cells were then washed for 5 min under continuously running water. The macrophage nuclei were visualized by staining with methyl green (Vector Labs) for 5 min and then washed for 1 min under running water. The coverslips were removed from the wells and mounted onto glass slides with Permount (Fisher).

**Homology Analysis.** The protein sequences used to generate the phylogenetic tree and alignments are as follows. Hc: *H. capsulatum* Veal EU543494, Ryp2 EU543495, Ryp3 EU543496; Bd: *B. dermatitidis* Veal, Ryp2, and Ryp3 were identified by TBLASTN search of the Hc protein sequences against the *B. dermatitidis* genome assembly version 3.0 (<http://genome.wustl.edu/>); Pb: *P. brasiliensis* Veal, Ryp2, and Ryp3 were identified by TBLASTN search of the Hc protein sequences against the version 1 of the Pb03 genome assembly ([www.broad.mit.edu/annotation/cgi/](http://www.broad.mit.edu/annotation/cgi/)); Ci: *C. immitis* Veal CIMG.06878.2, Ryp2 CIMG.01530.2, Ryp3 CIMG.09962.2 ([www.broad.mit.edu/annotation/cgi/](http://www.broad.mit.edu/annotation/cgi/)); An: *A. nidulans* VeA AF109316, VosA DQ856465, VelB EF540815; Af: *A. fumigatus* VeA XM747526, VosA EF544392, VelB Afu1g01970 ([www.broad.mit.edu/annotation/cgi/](http://www.broad.mit.edu/annotation/cgi/)); Mg: *M. grisea* VeA MGG08556.4, VosA MGG00617.4, VelB MGG01620.4 ([www.broad.mit.edu/annotation/cgi/](http://www.broad.mit.edu/annotation/cgi/)); Nc: *N. crassa* VE-1 NCU01731.2, VosA NCU05964.3, VelB NCU02775.3 ([www.broad.mit.edu/annotation/cgi/](http://www.broad.mit.edu/annotation/cgi/)); Fv: *F. verticillioides* VeA DQ274059, VelB FVEG.01498.3 ([www.broad.mit.edu/annotation/cgi/](http://www.broad.mit.edu/annotation/cgi/)); and Ac: *A. chrysogenum* VeA AM410093. The sequences were aligned with clustalX and the phylogenetic tree was generated using NJ Plot (7).

1. Nguyen VQ, Sil A (2008) Temperature-induced switch to the pathogenic yeast form of *Histoplasma capsulatum* requires *Ryp1*, a conserved transcriptional regulator *Proc Natl Acad Sci USA* 105:4880–4885.
2. Sullivan TD, Rooney PJ, Klein BS (2002) *Agrobacterium tumefaciens* integrates transfer DNA into single chromosomal sites of dimorphic fungi and yields homokaryotic progeny from multinucleate yeast. *Eukaryot Cell* 1:895–905.
3. Ochman H, Gerber AS, Hartl DL (1988) Genetic applications of an inverse polymerase chain reaction. *Genetics* 120:621–623.
4. Krajaeun T, Gauthier GM, Rappleye CA, Sullivan TD, Klein BS (2007) Development and application of a green fluorescent protein sentinel system for identification of RNA interference in *Blastomyces dermatitidis* illuminates the role of septin in morphogenesis and sporulation *Eukaryot Cell* 6:1299–1309.
5. Hwang LH, Mayfield JA, Rine J, Sil A (2008) *Histoplasma* requires *SID1*, a member of an iron-regulated siderophore gene cluster, for host colonization. *PLoS Pathog* 4:e1000044.
6. Marion CL, Rappleye CA, Engle JT, Goldman WE (2006) An alpha-(1,4)-amylase is essential for alpha-(1,3)-glucan production and virulence in *Histoplasma capsulatum* *Mol Microbiol* 62:970–983.
7. Perriere G, Gouy M (1996) WWW-Query: An on-line retrieval system for biological sequence banks. *Biochimie* 78:364–369.
8. Stinnett SM, Espeso EA, Cobeno L, Araujo-Bazan L, Calvo AM (2007) *Aspergillus nidulans* VeA subcellular localization is dependent on the importin  $\alpha$  carrier and on light. *Mol Microbiol* 63:242–255.
9. Bayram O, Krappmann S, Seiler S, Vogt N, Braus GH (2008) *Neurospora crassa* ve-1 affects asexual conidiation. *Fungal Genet and Biol* 45:127–138.

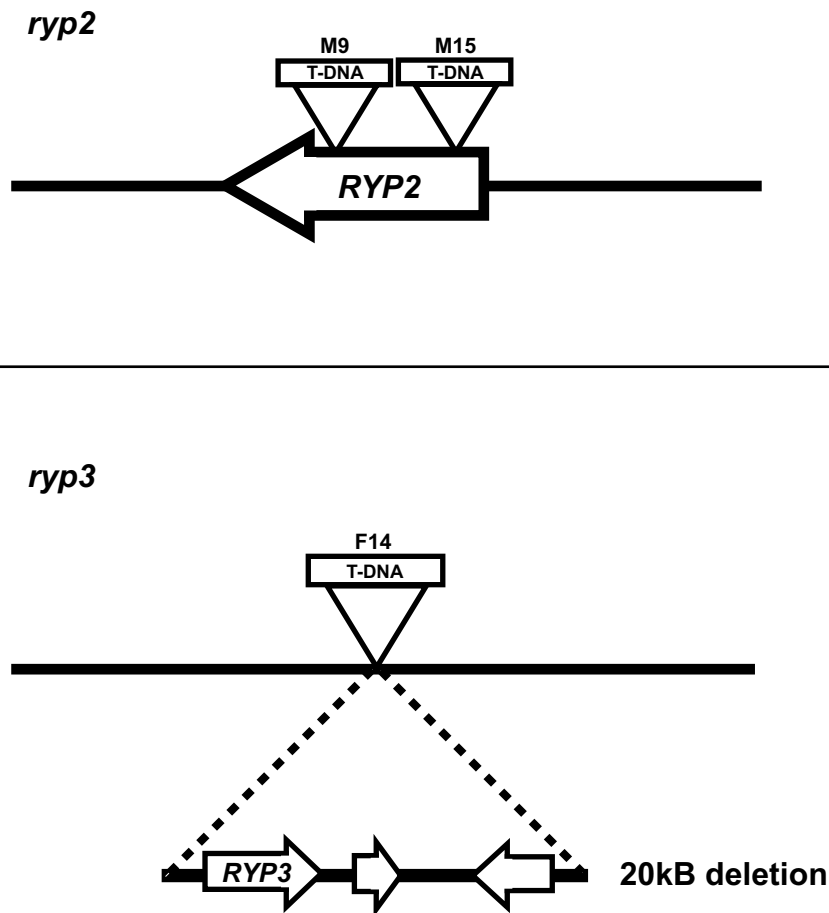

**Fig. S1.** Schematic representation depicting the position of the T-DNA insertion events in the *ryp2* and *ryp3* mutants obtained from the screen. Two independent T-DNA insertions mutants, M9 and M15, were located within the *RYP2* ORF. F14 contained a 20-kb deletion that eliminated the *RYP3* ORF as well as two unrelated genes, one of which represents the remnant of a retrotransposon.



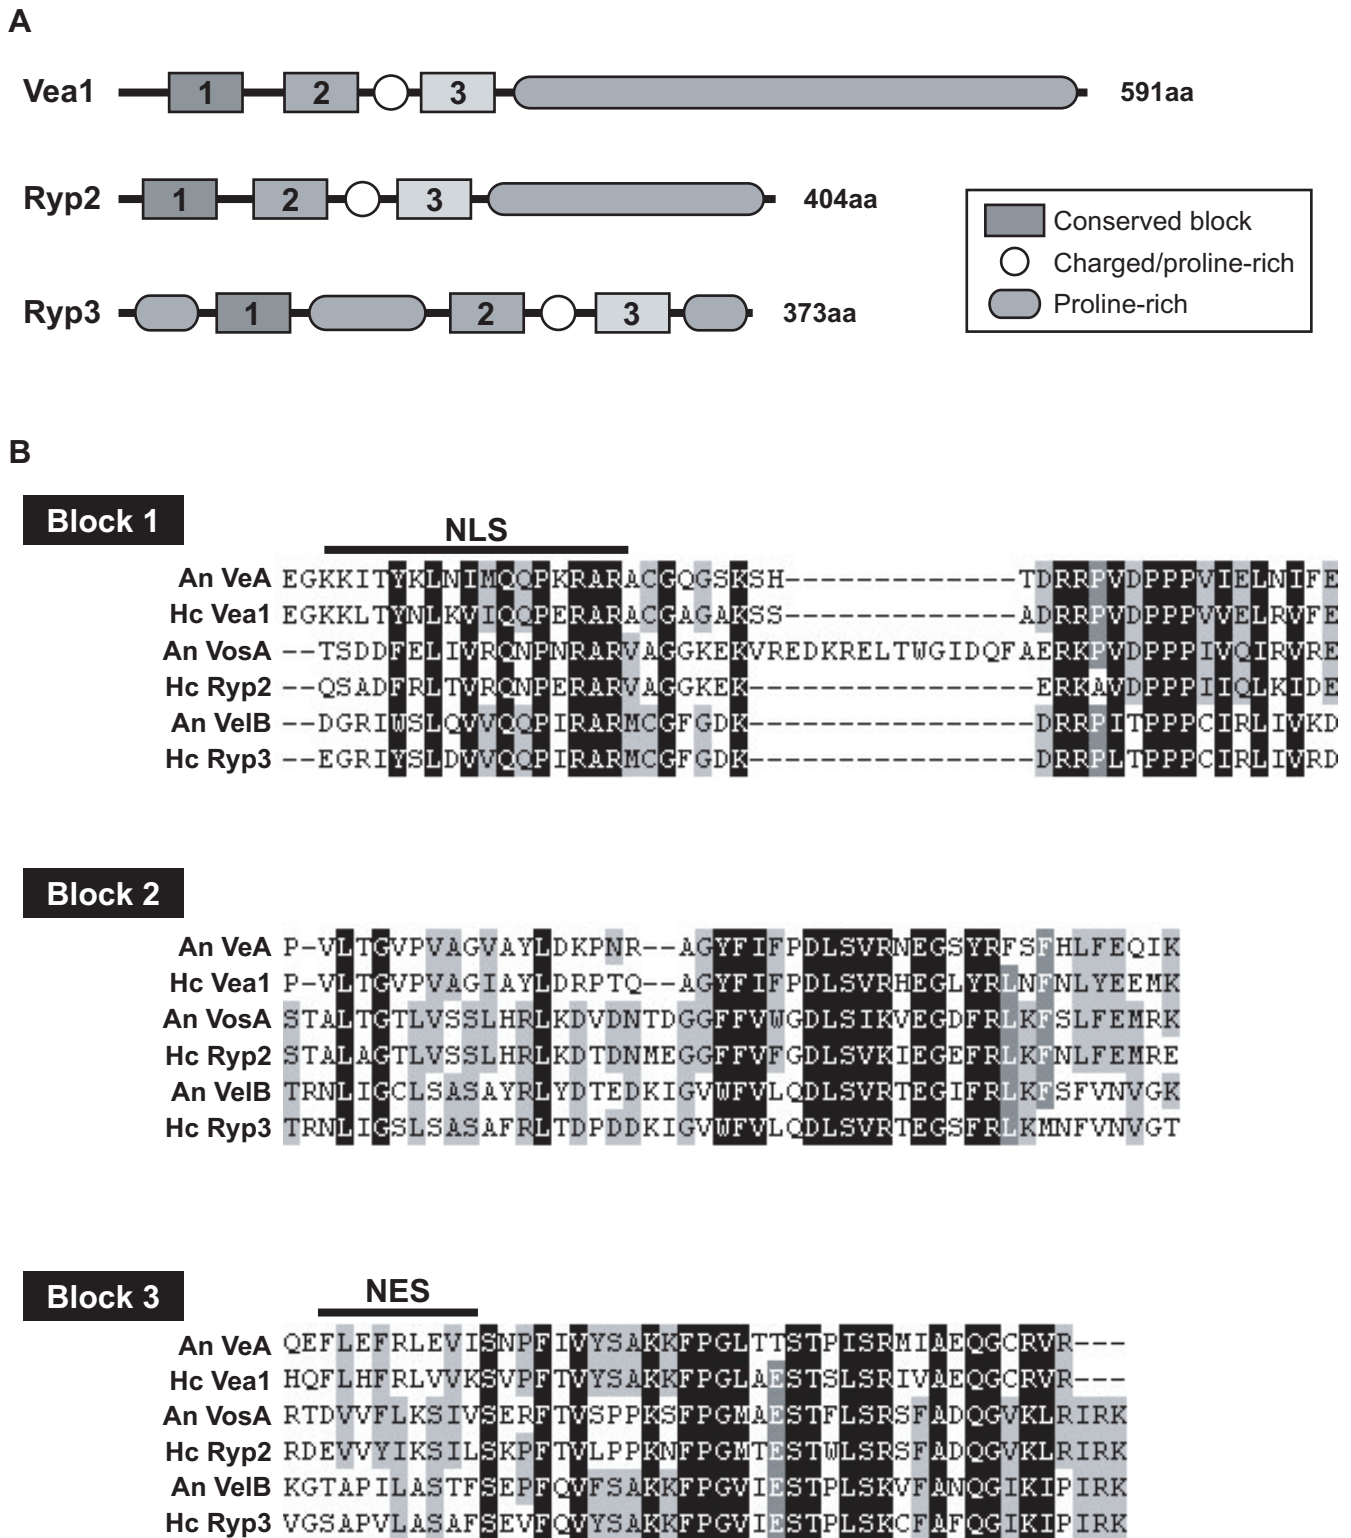

**Fig. S3.** Ryp2, Ryp3, and VeA are highly conserved. (A) Diagram representing the protein domain structure of the VeA family members in *H. capsulatum*. Blocks 1, 2, and 3 are shown in more detail in (B). (B) Alignments of the highly conserved regions of the VeA family members in *H. capsulatum* and *A. nidulans*. Putative NLS and NES in *A. nidulans* VeA are indicated (8, 9).



**Table S1. Relative gene expression by qRT-PCR**

| Sample               | <i>RYP2</i>         |        | <i>RYP3</i>         |       | <i>RYP1</i>         |       |
|----------------------|---------------------|--------|---------------------|-------|---------------------|-------|
|                      | Relative expression | SD     | Relative expression | SD    | Relative expression | SD    |
| RT control filaments | 1                   | 0.341  | 1                   | 0.414 | 1                   | 0.353 |
| <i>ryp2-1</i>        | 0.268               | 0.061  | 0.330               | 0.145 | 1.532               | 0.680 |
| <i>ryp2-2</i>        | 0.280               | 0.064  | 0.563               | 0.255 | 2.012               | 0.736 |
| <i>ryp3-1</i>        | 0.513               | 0.135  | 0.214               | 0.159 | 5.351               | 1.606 |
| <i>ryp3-2</i>        | 0.165               | 0.050  | 0.219               | 0.100 | 0.791               | 0.408 |
| <i>ryp1</i>          | 2.274               | 1.365  | 0.344               | 0.163 | nd                  | nd    |
| 37°C control yeast   | 36.979              | 11.010 | 3.301               | 1.089 | 23.244              | 6.320 |
| <i>ryp2-1</i>        | 0.107               | 0.040  | 0.164               | 0.090 | 0.752               | 0.366 |
| <i>ryp2-2</i>        | 0.054               | 0.018  | 0.121               | 0.048 | 0.322               | 0.149 |
| <i>ryp3-1</i>        | 0.066               | 0.022  | 0.049               | 0.025 | 0.178               | 0.088 |
| <i>ryp3-2</i>        | 0.028               | 0.008  | 0.079               | 0.034 | 0.424               | 0.194 |
| <i>ryp1</i>          | 0.468               | 0.206  | 0.229               | 0.112 | nd                  | nd    |

nd, not determined; SD, standard deviation.
